# Supplementary material for: Ring-opening of furfuryl alcohol to pentanediol with extremely high selectivity over Cu/MFI catalysts with balanced Cu0–Cu+ and Brønsted acid sites
Source: Royal Society of Chemistry journal article supplement (doi:10.1039/d2cy01028c), 2022-01-01
Supplement: d2cy01028c1.pdf [file d2cy01028c1.pdf]

## Supporting information

### **Ring-opening of furfuryl alcohol to pentanediol with extremely high selectivity over Cu/MFI catalysts with balance Cu<sup>0</sup>-Cu<sup>+</sup> and Brønsted acid sites**

Dengfeng Dai<sup>a</sup>, Chao Feng<sup>a</sup>, Minmin Wang<sup>a</sup>, Qingzhou Du<sup>a</sup>, Dandan Liu<sup>a,b\*</sup>, Yuan Pan<sup>a\*</sup>, Yunqi Liu<sup>a\*</sup>

<sup>a</sup>State Key Laboratory of Heavy Oil Processing, China University of Petroleum (East China), Qingdao 266580 (China), [liyuyq-group@upc.edu.cn](mailto:liyuyq-group@upc.edu.cn), [panyuan@upc.edu.cn](mailto:panyuan@upc.edu.cn)

<sup>b</sup>College of New Energy, China University of Petroleum (East China), Qingdao 266580 (China), [liudandan@upc.edu.cn](mailto:liudandan@upc.edu.cn)

\*Corresponding author

## 1.1 Characterization techniques

H<sub>2</sub>-TPR experiments of the samples were carried out on the AutoChem HP 2950 chemisorption analyzer (Micromeritics). The samples (100 mg) were pretreated under Ar gas at 350 °C for 1 h and conducted with 5 vol% H<sub>2</sub>/Ar at a heating rate of 10 °C/min from room temperature to 800 °C.

Cu loadings and SiO<sub>2</sub>/Al<sub>2</sub>O<sub>3</sub> ratios of all the catalysts were determined by inductively coupled plasma atomic emission spectroscopy (ICP-OES) on an IRIS Intrepid II XSP instrument (Thermo Electron Corporation).

CO in situ diffuse reflectance infrared Fourier transform spectra (CO-DRIFT) measurements on the reduced Cu/Beta zeolites were conducted on a spectrometer (Bruker vertex 70) with 64 scans at a resolution of 4 cm<sup>-1</sup>. The self-supporting pellets of the catalyst samples were placed into the reaction chamber, pretreated under helium flowing at 250 °C for 40min, and subsequently cooled to 25 °C capture background. Then, CO (10% CO/90 % He) was introduced into the DRIFT cell at a gas flow rate of 20 mL/min; The DRIFTS spectra were obtained after 5min stabilization.

## 1.2 Computational details

All calculations were performed using the density functional theory (DFT) technique using the Vienna ab initio simulation package (VASP). Spin-polarized calculations were performed using the generalized gradient approximation (GGA) combined with the Perdew–Burke–Ernzerhof (PBE) method to determine the exchange and correlation energies. The projector-augmented wave (PAW) method was used to represent the core–valence electron interactions. The typical plane-wave cutoff energy was 400 eV for basis-set expansion. For geometry optimization calculations, forces were converged below 0.03 eV/Å. The SCF convergence energy was 1 × 10<sup>-4</sup> Ha. A 1 × 1 × 1 k-point mesh was used to perform all the calculations.

The binding energy ( $E_{ads}$ ) was calculated as follows:

$$E_{ads} = E_{adsorbate + surface} - E_{surface} - E_{gas}$$

where  $E_{surface}$  is the clean surface relaxation energy of the surface slab,  $E_{gas}$  is the energy of a free gas molecule under conditions of vacuum, and  $E_{adsorbate+surface}$  is the energy of the composite system. As the calculations are performed at 0 K at a fixed cell volume,

the differences in the Gibbs free energy should equal the differences in the total energy. By this definition, a negative value of  $E_{ads}$  corresponds to exothermic and spontaneous adsorption processes.

### 1.3 Figures and Tables

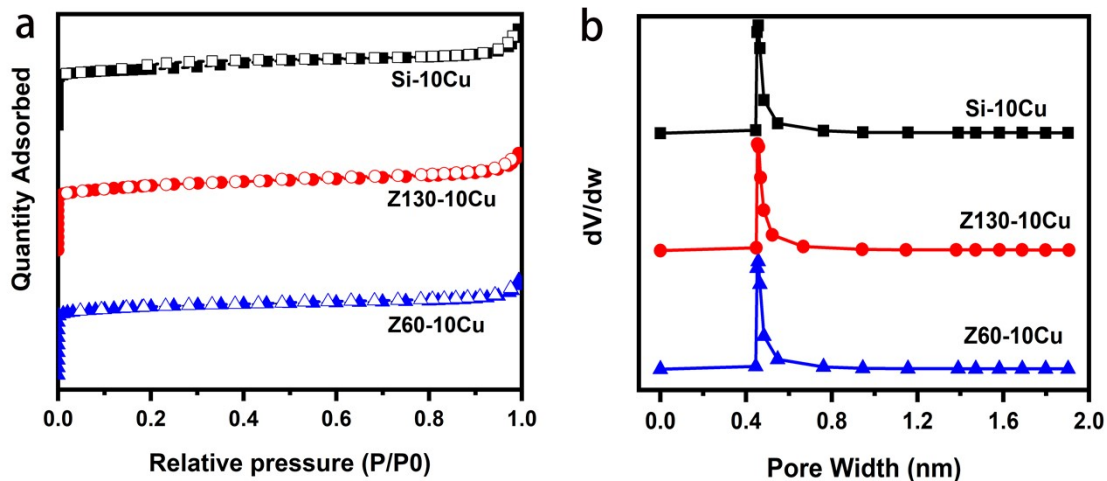

Figure S1. (a): full nitrogen sorption isotherms of the Z60-10Cu, Z130-10Cu, and Si-10Cu; (b): pore size distribution of the Z60-10Cu, Z130-10Cu, and Si-10Cu.

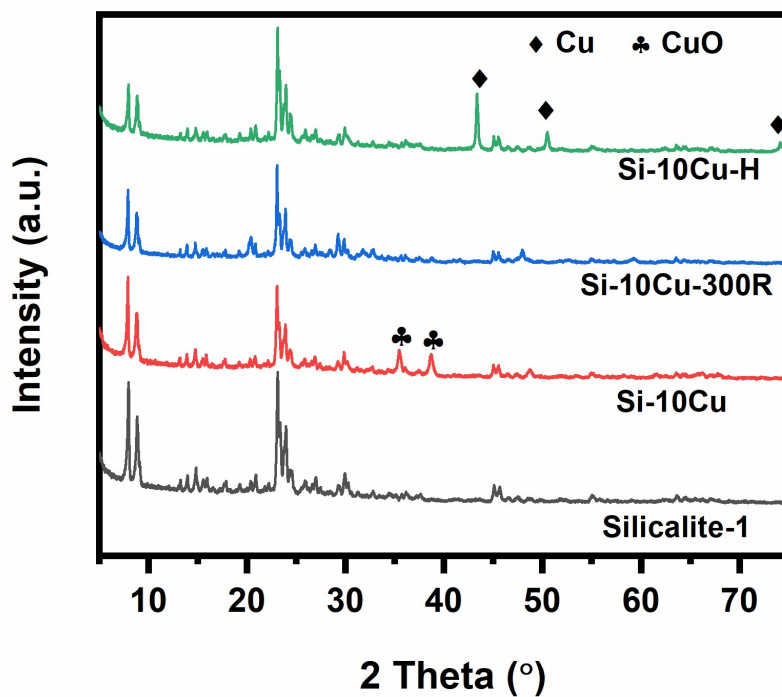

Figure S2. XRD patterns of the Silicalite-1, Si-10Cu, Si-10Cu-300R, Si-10Cu-H.

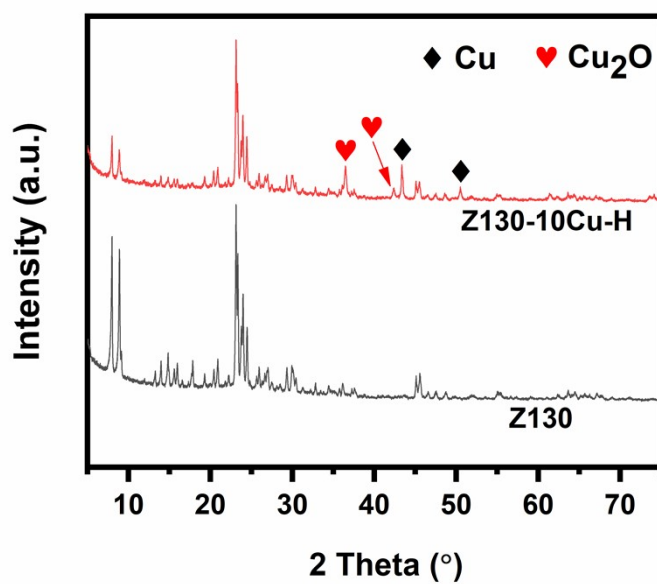

Figure S3. XRD patterns of the Z130, Z130-10Cu-H.

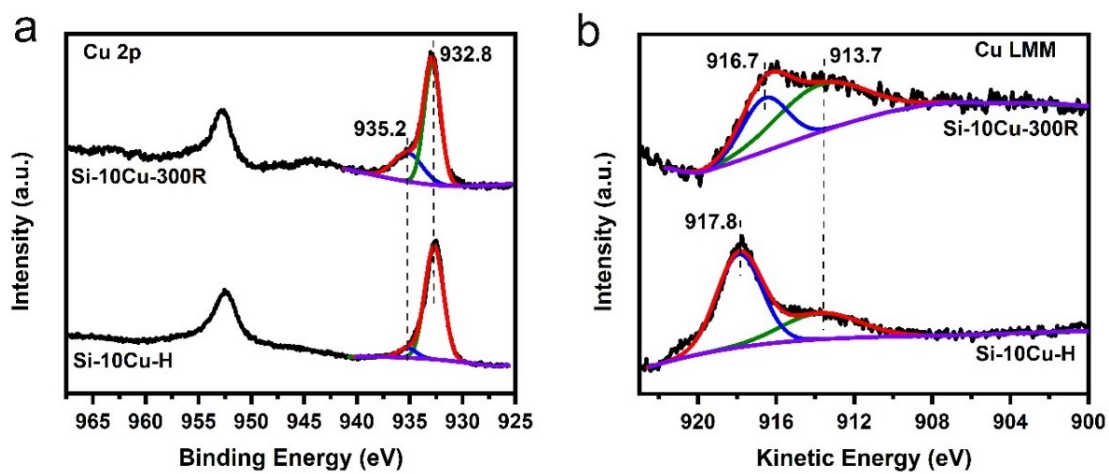

Figure S4. (a): Cu 2p XPS spectrum of Si-10Cu-300R and Si-10Cu-H; (b): Cu LMM XAES spectrum of Si-10Cu-300R and Si-10Cu-H;

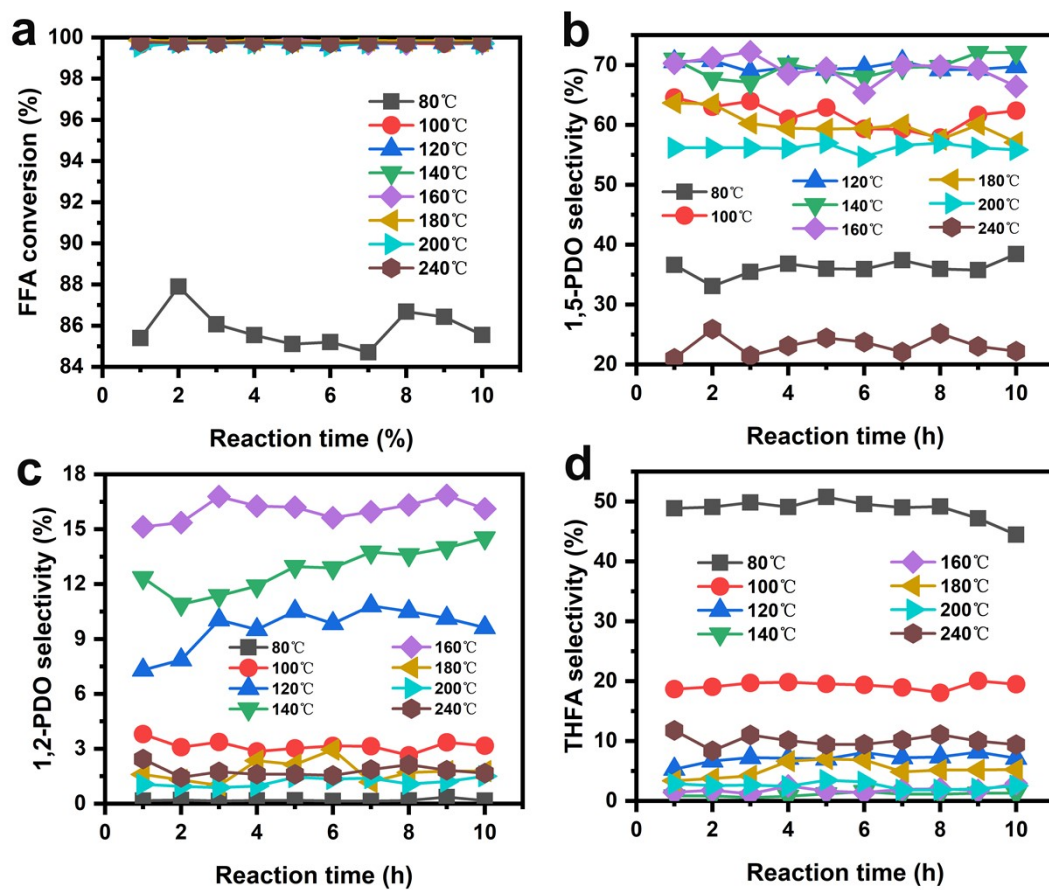

Figure S5. The effect of reaction temperatures on ring-opening of FFA over Z60-10Cu-300R catalyst

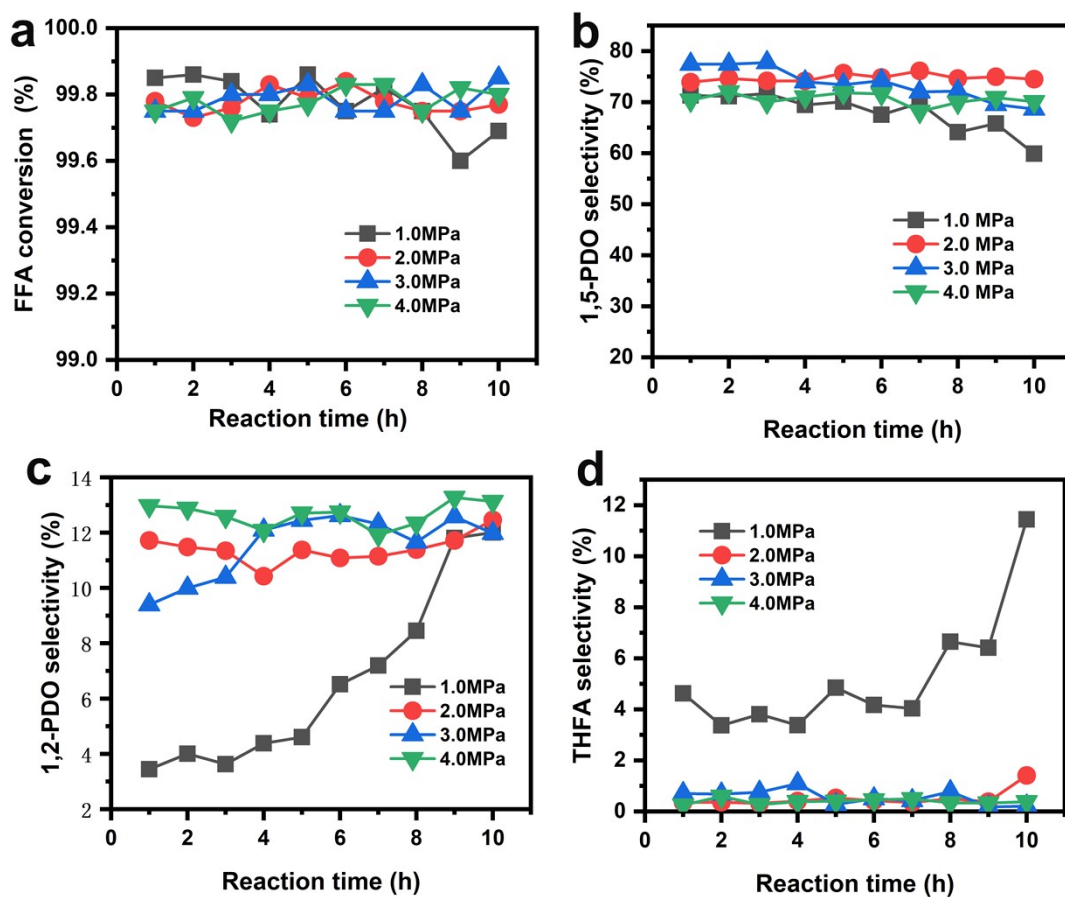

Figure S6. The effect of reaction pressure on ring-opening of FFA over Z60-10Cu-300R catalyst

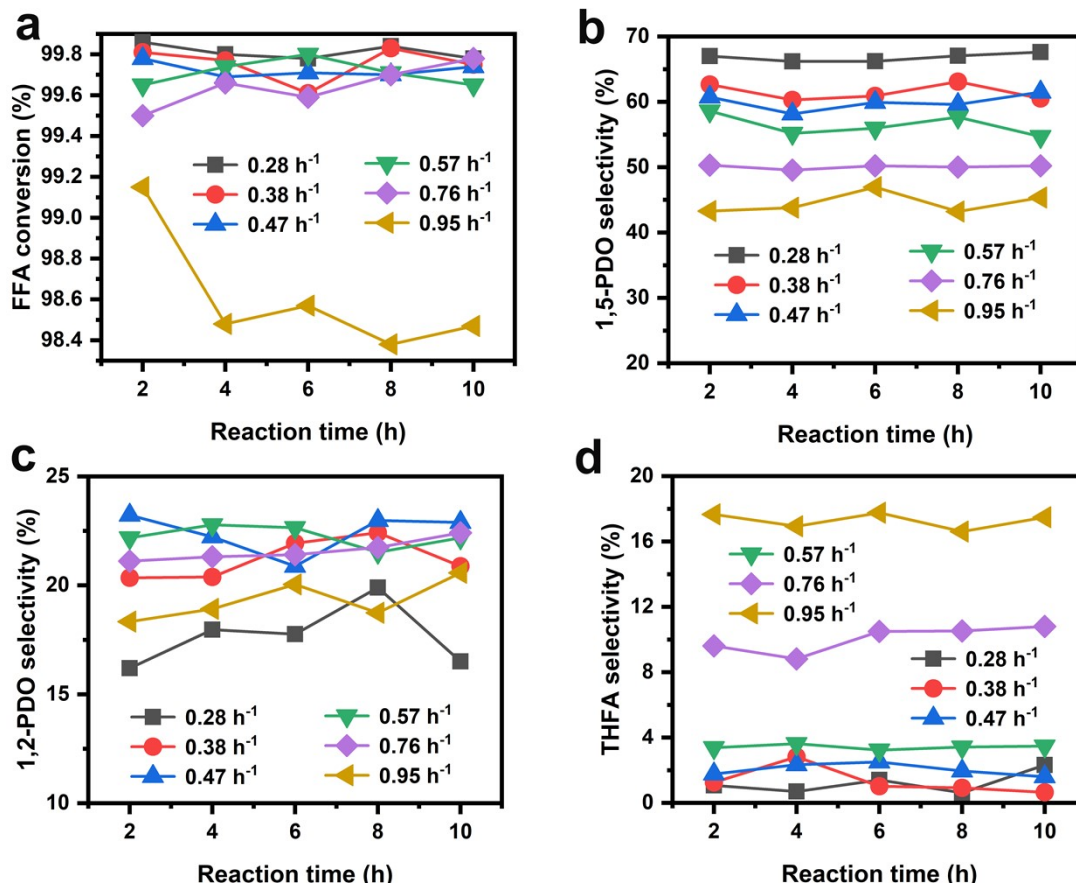

Figure S7. The effect of WHSV on ring-opening of FFA over Z60-10Cu-300R catalyst

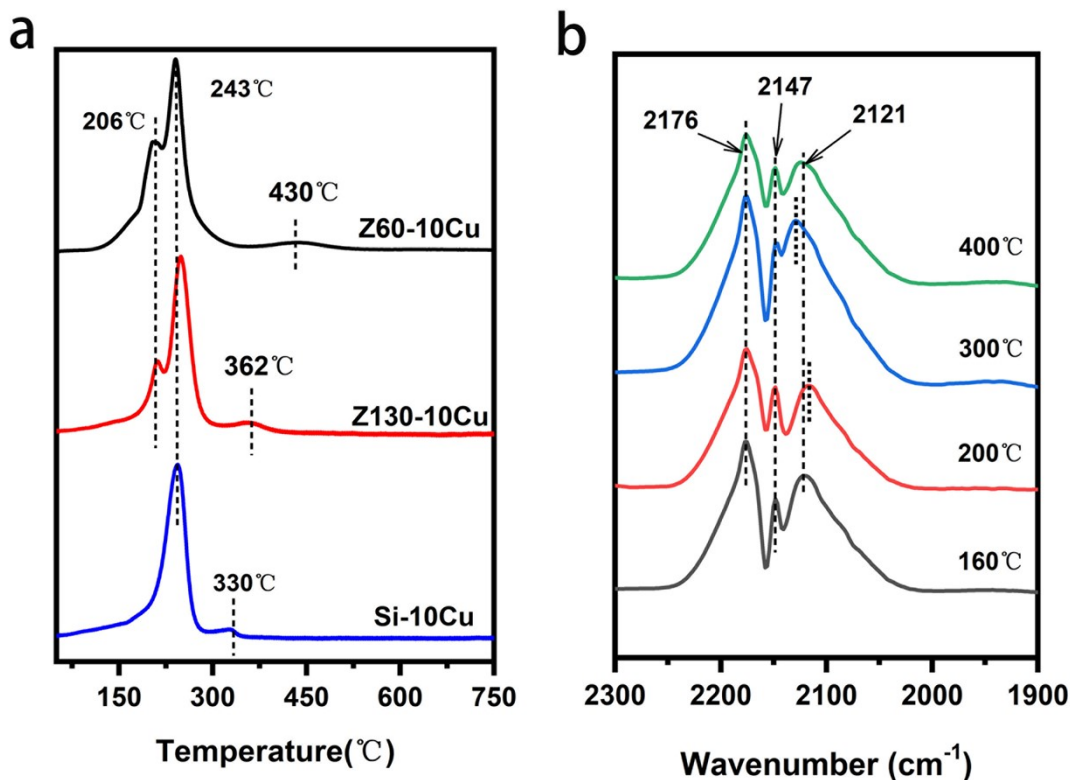

Figure S8. (a): H<sub>2</sub>-TPR profile of Z60-10Cu, Z130-10Cu, Si-10Cu; (b) CO-DRIFT profiles of Z60-10Cu-160°C, Z60-10Cu-200°C, Z60-10Cu-300°C, Z60-10Cu-400°C. Note: Z60-10Cu-160°C sample was Z60-10Cu activated by hydrogen at 160 °C for 0.5 h.

The H<sub>2</sub>-TPR profile of the Z60-10Cu catalyst displayed two main peaks at 206°C and 243°C, which should be ascribed to the reduction of highly dispersed CuO and the reduction of CuO with small size, indicating the uniformly distribution of the small Cu particles<sup>[1,2]</sup>, and was validated by the HRTEM result. A broad signal at ~430°C was observed in the Z60-10Cu, as a result of strong interaction between Cu species and support<sup>[3,4]</sup>. Similar reduction peaks also appear in the Z130-10Cu and Si-10Cu catalyst, but the reduction peak at high-temperature stage is slightly lower than Z60-10Cu, It may be related to the density of hydroxyl group and Si(OH)Al on the support surface. As we all know, hydroxyl group and Si(OH)Al can be used as anchor sites to fix the active metal and enhance the metal-support interaction<sup>[5,6]</sup>. Especially the MFI support after ammonia treatment may increase anchor sites.



The CO-DRIFT spectroscopy of different reduction temperature presented three characteristic bands at  $\sim 2176\text{ cm}^{-1}$ ,  $\sim 2147\text{ cm}^{-1}$ , and  $\sim 2121\text{ cm}^{-1}$ , can be ascribed to the symmetric and antisymmetric vibrations of  $\text{Cu}^+(\text{CO})_2$  species and  $\text{Cu}^+\text{-CO}$  species<sup>[7-9]</sup>, respectively. Owing to the weaker interaction between  $\text{Cu}^{2+}$ ,  $\text{Cu}^0$  and CO, the corresponding  $\text{Cu}^{2+}\text{-CO}$  and  $\text{Cu}^0\text{-CO}$  complexes are very unstable and difficult to detect, particularly when they are in copresence with  $\text{Cu}^+$  sites<sup>[9]</sup>.

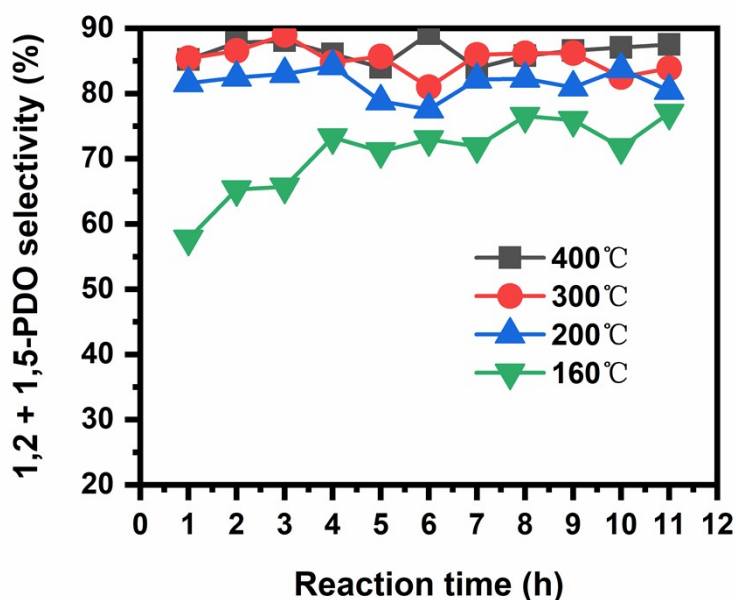

Figure S9. The selectivity of 1,2 and 1,5-PDO after being reduced at a different temperature, catalysts performance test condition: 160 °C and 2.5 MPa of 40 ml/min  $\text{H}_2$ , 2 wt% FFA, ETOH as solvent, 0.2 ml/min.

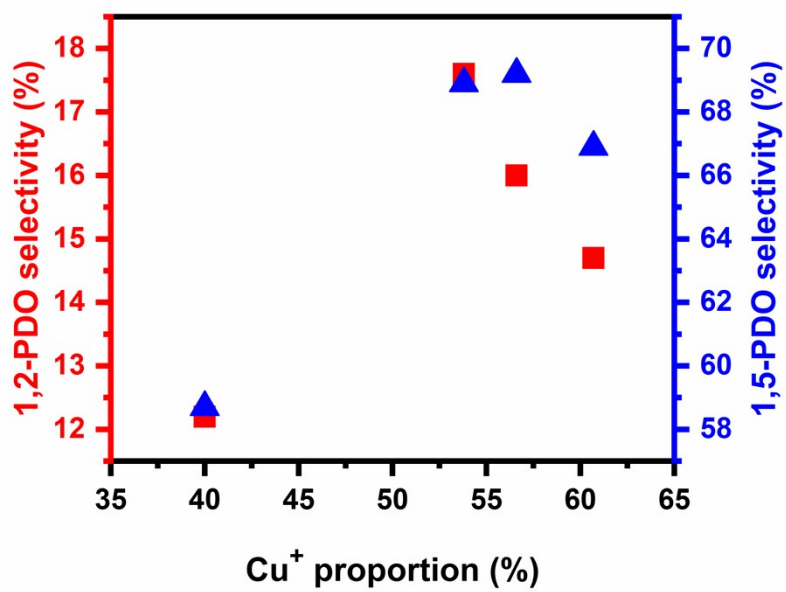

Figure S10. Correlation of Cu<sup>+</sup> proportion and PDO selectivity.

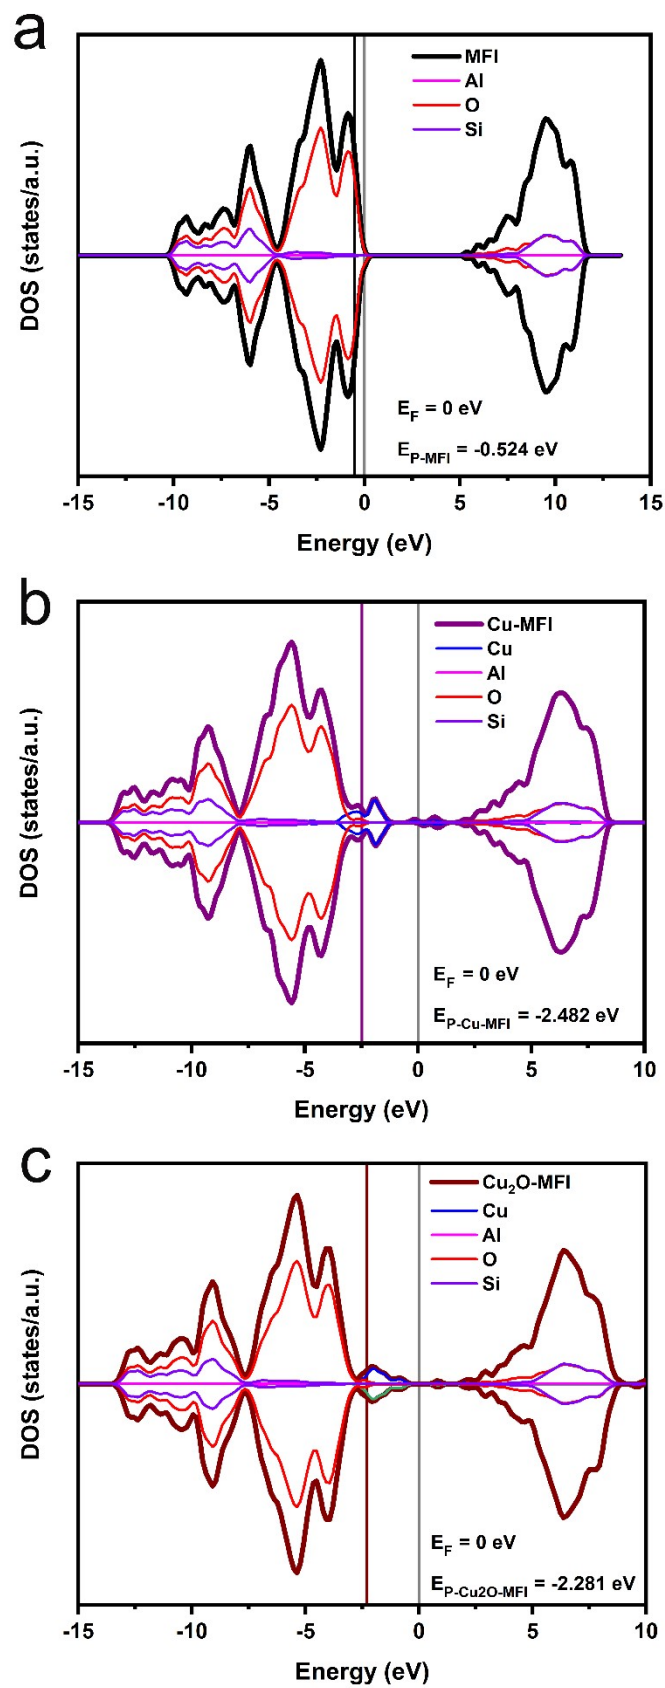

Figure S11. Density of states (DOS) for (a): MFI, (b): Cu-MFI, and (c): Cu<sub>2</sub>O-MFI

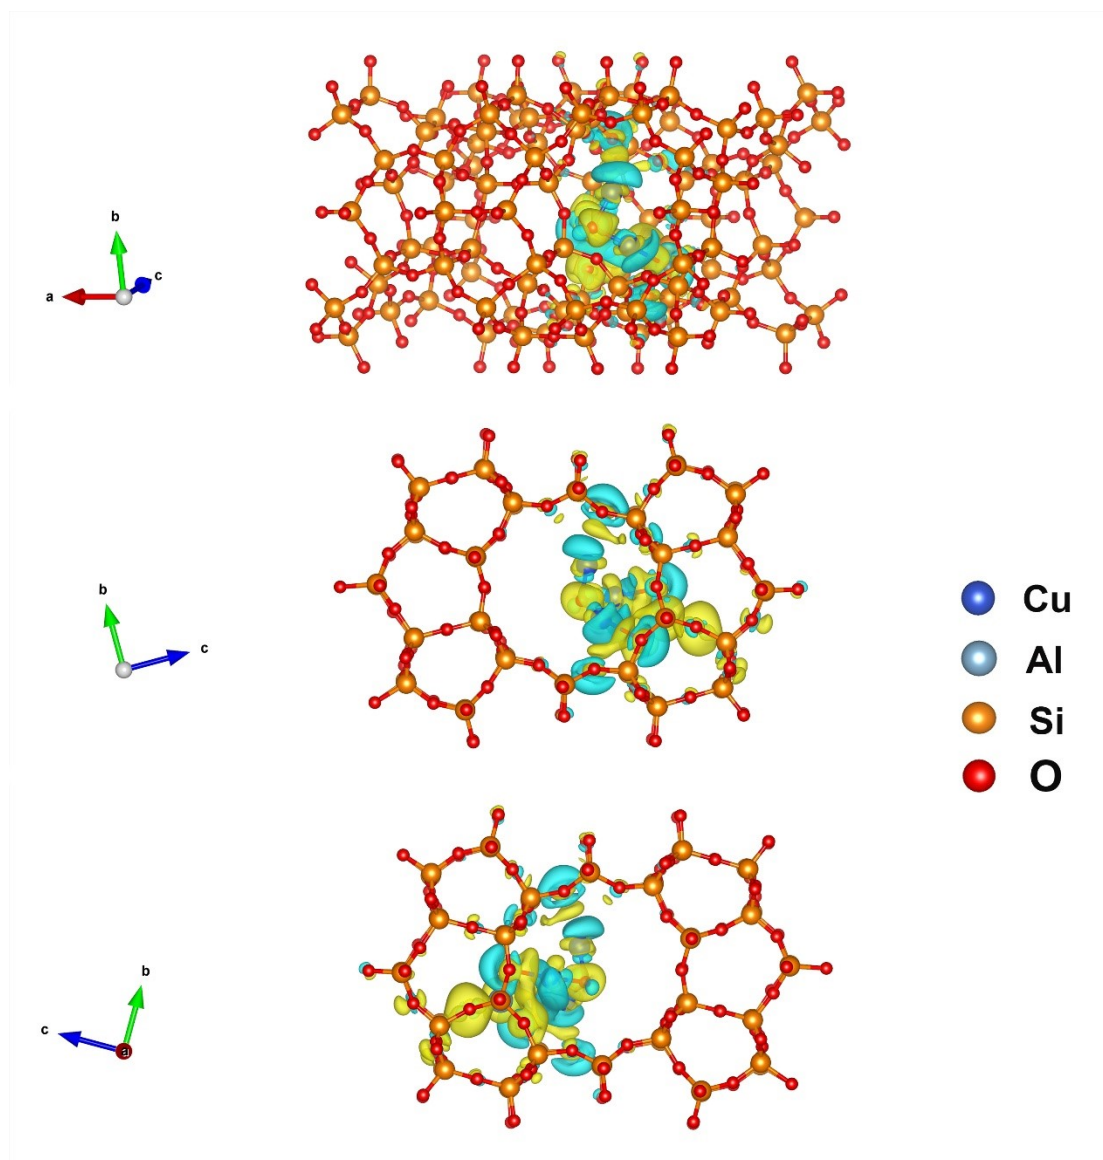

Figure S12. Differential charge density diagram of Cu<sub>2</sub>O-MFI

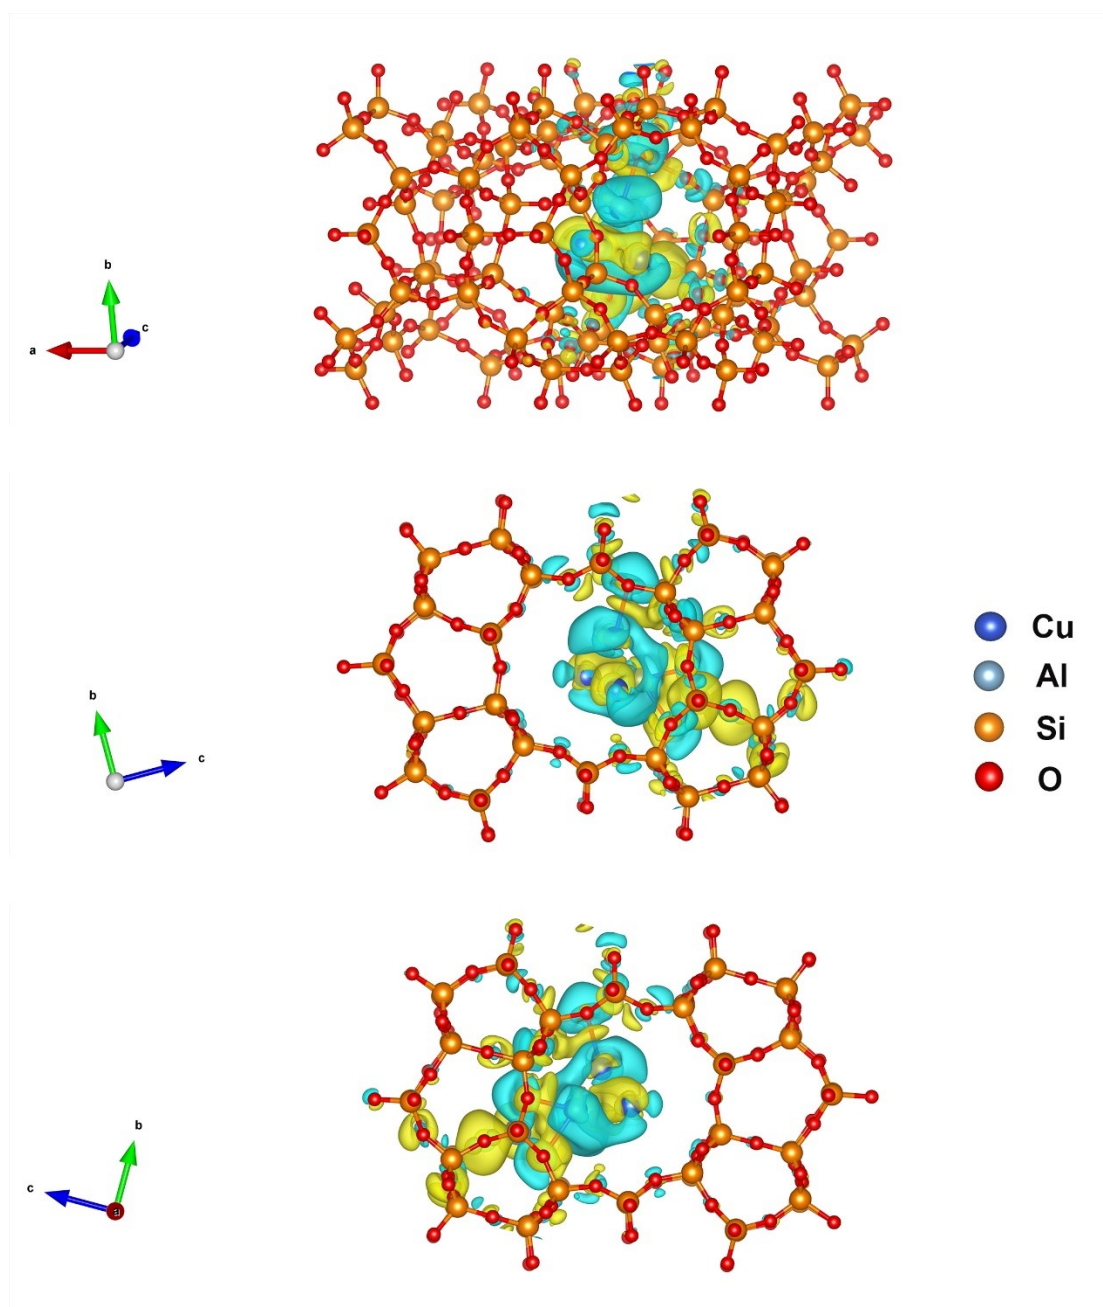

Figure S13. Differential charge density diagram of Cu-MFI

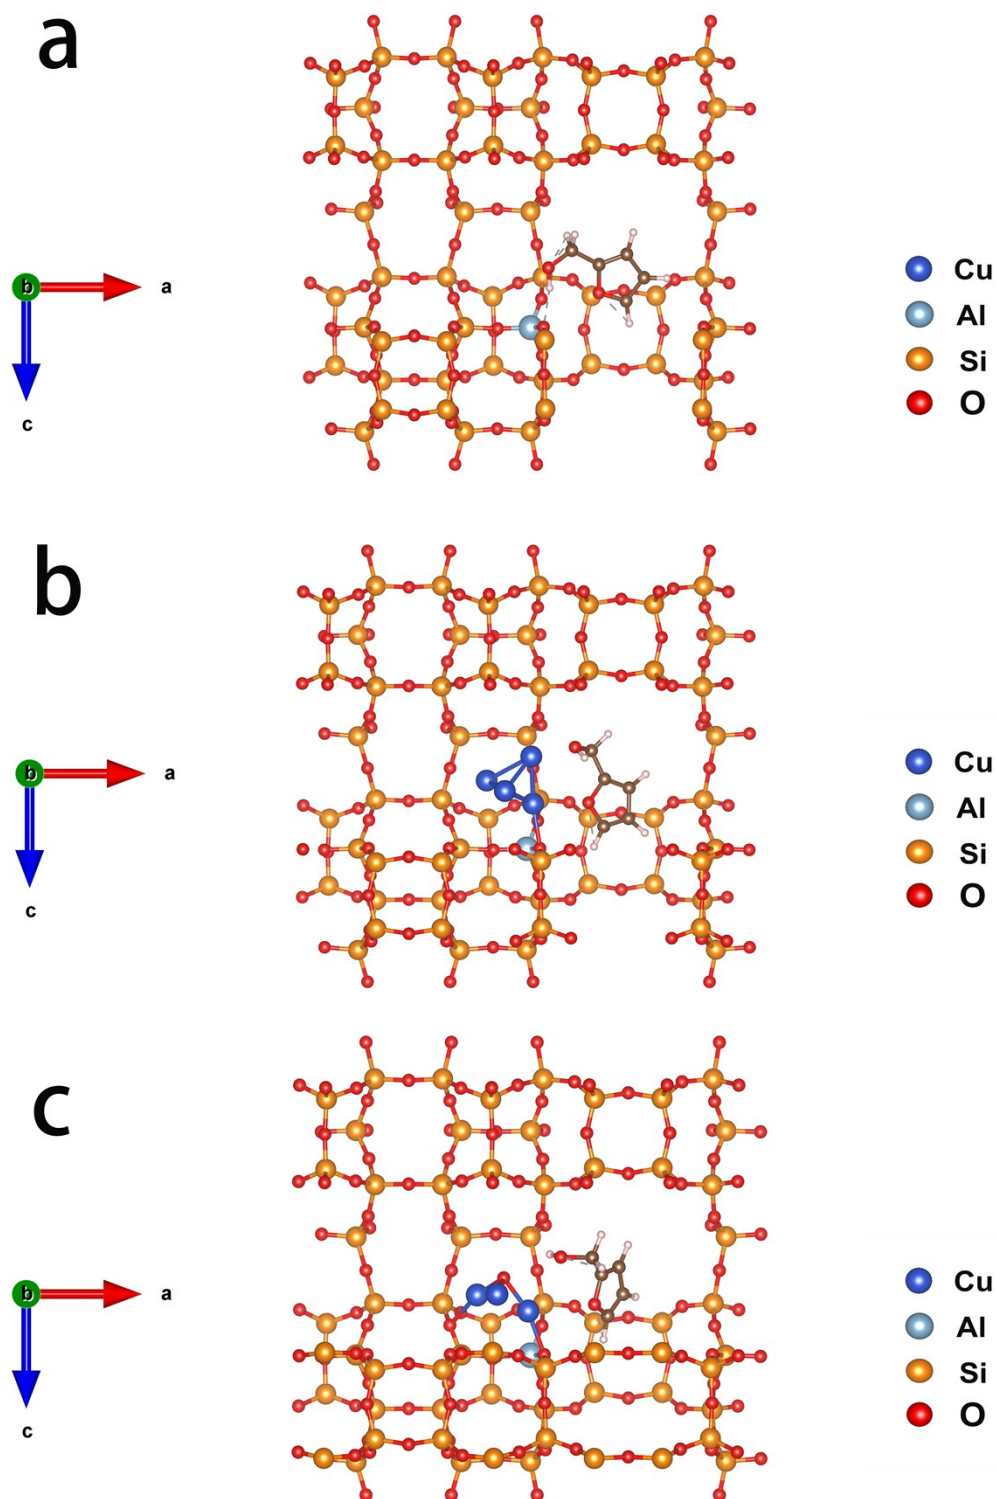

Figure S14. The adsorption configurations of FFA on different materials (section view). (a): FFA-MFI, (b): FFA-Cu, and (c): FFA-Cu<sub>2</sub>O

Table S1. The selectivity ratio of 1,5-PDO/1,2-PDO in the literature

| Feed            | Catalyst                              | Batch/<br>Flow | T<br>(°C)  | P<br>(MPa) | RT <sup>b</sup> /<br>WHSV <sup>c</sup> | S <sub>1,2-PDO</sub> | S <sub>1,5-PDO</sub> | S <sub>1,5-PDO</sub> /<br>S <sub>1,2-PDO</sub> | Ref                  |
|-----------------|---------------------------------------|----------------|------------|------------|----------------------------------------|----------------------|----------------------|------------------------------------------------|----------------------|
| FFA             | Cu/Al <sub>2</sub> O <sub>3</sub>     | Batch          | 140        | 8.0        | 8 h                                    | 48.6%                | 22.7%                | 0.47                                           | [10]                 |
| FFA             | Cu/LaCoO <sub>3</sub>                 | Batch          | 140        | 6.0        | 2 h                                    | 15.2%                | 40.3%                | 2.65                                           | [11]                 |
| FFA             | Cu-Co-Al                              | Batch          | 160        | 4.0        | 2 h                                    | 16.1%                | 41.6%                | 2.58                                           | [12]                 |
| FFA             | Cu-Mg <sub>3</sub> AlO <sub>4.5</sub> | Batch          | 140        | 6.0        | 24 h                                   | 51.2%                | 28.8%                | 0.56                                           | [13]                 |
| FFA             | Pt/CeO <sub>2</sub>                   | Batch          | 170        | 1.0        | 1.5 h                                  | 65.0%                | 8.0%                 | 0.12                                           | [14]                 |
| FFA             | Pt/CeO <sub>2</sub>                   | Batch          | 165        | 2.0        | 12 h                                   | 77.0%                | 7.0%                 | 0.09                                           | [15]                 |
| FFA             | Pt/MgAlO <sub>x</sub>                 | Flow           | 200        | 3.0        | 0.12 h <sup>-1</sup>                   | 86.0%                | 5.0%                 | 0.06                                           | [16]                 |
| FFA             | Pt/Co <sub>2</sub> AlO <sub>4</sub>   | Batch          | 140        | 1.5        | 24 h                                   | 16.2%                | 34.9%                | 2.15                                           | [17]                 |
| FA <sup>a</sup> | CuMgAlO                               | Batch          | 150        | 6.0        | 6 h                                    | 55.2%                | 28.5%                | 0.52                                           | [18]                 |
| <b>FFA</b>      | <b>Cu/MFI</b>                         | <b>Flow</b>    | <b>160</b> | <b>2.5</b> | <b>0.19 h<sup>-1</sup></b>             | <b>16.0%</b>         | <b>69.2%</b>         | <b>4.33</b>                                    | <b>This<br/>work</b> |

(1) <sup>a</sup>FA: furfural

(2) <sup>b</sup>RT: reaction time in batch

(3) <sup>c</sup>WHSV: Weight Hour Space Velocity, h<sup>-1</sup>

Table S2. The proportions of copper valence state calculated by XPS and XAES

| <b>catalyst</b> | <b>Cu<sup>2+</sup> %</b> | <b>Cu<sup>+</sup> %</b> | <b>Cu<sup>0</sup> %</b> |
|-----------------|--------------------------|-------------------------|-------------------------|
| Si-10Cu-300R    | 29.77                    | 44.60                   | 25.63                   |
| Si-10Cu-H       | 7.71                     | 30.10                   | 62.19                   |

Table S3. The effect of reaction temperature on ratio of 1,5-PDO/1,2-PDO selectivity

| <b>selectivity</b> | <b>80°C</b> | <b>100°C</b> | <b>120°C</b> | <b>140°C</b> | <b>160°C</b> | <b>180°C</b> | <b>200°C</b> | <b>240°C</b> |
|--------------------|-------------|--------------|--------------|--------------|--------------|--------------|--------------|--------------|
| 1,5-PDO            | 36.1%       | 61.6%        | 69.7%        | 69.6%        | 69.2%        | 60.0%        | 56.2%        | 23.3%        |
| 1,2-PDO            | 0.20%       | 3.2%         | 9.6%         | 12.8%        | 16.0%        | 1.8%         | 1.2%         | 1.8%         |
| 1,5-PDO/1,2-PDO    | 180.5       | 19.3         | 7.3          | 5.4          | 4.3          | 33.3         | 46.8         | 12.9         |

Table S4. The effect of reaction pressure on ratio of 1,5-PDO/1,2-PDO selectivity

| <b>selectivity</b> | <b>1.0 MPa</b> | <b>2.0 MPa</b> | <b>3.0 MPa</b> | <b>4.0 MPa</b> |
|--------------------|----------------|----------------|----------------|----------------|
| 1,5-PDO            | 61.6%          | 74.5%          | 73.7%          | 70.6%          |
| 1,2-PDO            | 6.0%           | 11.2%          | 11.6%          | 12.7%          |
| 1,5-PDO/1,2-PDO    | 10.3           | 6.7            | 6.4            | 5.6            |



Table S5. the bader charge of Cu-MFI

| atom | bader |    |
|------|-------|----|
| Cu   | 10.9  | 11 |
| Cu   | 10.96 | 11 |
| Cu   | 10.72 | 11 |
| Cu   | 10.61 | 11 |

Table S6. the bader charge of Cu<sub>2</sub>O-MFI

| atom | bader |    |
|------|-------|----|
| Cu   | 10.44 | 11 |
| Cu   | 10.40 | 11 |
| Cu   | 10.48 | 11 |

The bader analysis of Cu-MFI shows that the valence electrons of four Cu atoms are 10.90,10.96,10.72,10.61, respectively. Except for the Cu atom coordinated with MFI, the coordination of the other three Cu atoms is closer to the zero-valence state of metal Cu. But in Cu<sub>2</sub>O-MFI, the valence electrons of Cu are 10.44, 10.40 and 10.48, respectively. It can be considered that there are 0.5 valence electrons for bonding and the valence state becomes +1.

## References

- [1] Z. Huang, F. Cui, H. Kang, J. Chen, X. Zhang, C. Xia, *Chem. Mater.* **2008**, 20, 5090-5099.
- [2] J. Pang, M. Zheng, C. Wang, X. Yang, H. Liu, X. Liu, J. Sun, Y. Wang, T. Zhang, *ACS Catal.* **2020**, 10, 13624-13629.
- [3] R. Fan, Y. Zhang, Z. Hu, C. Chen, T. Shi, L. Zheng, H. Zhang, J. Zhu, H. Zhao, G. Wang, *Nano Res.* **2021**, 14, 4601-4609.
- [4] Y. Zhao, Z. Guo, H. Zhang, B. Peng, Y. Xu, Y. Wang, J. Zhang, Y. Xu, S. Wang, X. Ma, *J. Catal.* **2018**, 357, 223-237.
- [5] W. Ding, G. D. Meitzner, D. O. Marler, E. Iglesia, *The Journal of Physical Chemistry B.* **2001**, 105, 3928-3936.
- [6] I. Julian, J. L. Hueso, N. Lara, A. Solé-Daurá, J. M. Poblet, S. G. Mitchell, R. Mallada, J. Santamaría, *Catal. Sci. Technol.* **2019**, 9, 5927-5942.
- [7] P. Cao, L. Lin, H. Qi, R. Chen, Z. Wu, N. Li, T. Zhang, W. Luo, *ACS Catal.* **2021**, 11, 10246-10256.
- [8] A. M. Abdel-Mageed, B. Rungtaweeworanit, M. Parlinska-Wojtan, X. Pei, O. M. Yaghi, R. J. Behm, *J. Am. Chem. Soc.* **2019**, 141, 5201-5210.
- [9] G. T. Palomino, S. Bordiga, A. Zecchina, G. L. Marra, C. Lamberti, *The Journal of Physical Chemistry B.* **2000**, 104, 8641-8651.
- [10] H. Liu, Z. Huang, H. Kang, C. Xia, J. Chen, *Chinese J. Catal.* **2016**, 37, 700-710.
- [11] Fangfang Gao, H. Liu, X. Hu, J. Chen, Z. Huang, C. Xia, *Chinese J. Catal.* **2018**, 39, 1711-1723.
- [12] T. P. Sulmonetti, B. Hu, S. Lee, P. K. Agrawal, C. W. Jones, *ACS Sustain. Chem. Eng.* **2017**, 5, 8959-8969.
- [13] H. Liu, Z. Huang, F. Zhao, F. Cui, X. Li, C. Xia, J. Chen, *Catal. Sci. Technol.* **2016**, 6, 668-671.
- [14] R. Ma, X. Wu, T. Tong, Z. Shao, Y. Wang, X. Liu, Q. Xia, X. Gong, *ACS Catal.* **2017**, 7, 333-337.
- [15] T. Tong, X. Liu, Y. Guo, M. Norouzi Banis, Y. Hu, Y. Wang, *J. Catal.* **2018**, 365, 420-428.
- [16] Y. Zhu, W. Zhao, J. Zhang, Z. An, X. Ma, Z. Zhang, Y. Jiang, L. Zheng, X. Shu, H. Song, et al., *ACS Catal.* **2020**, 10, 8032-8041.
- [17] W. Xu, H. Wang, X. Liu, J. Ren, Y. Wang, G. Lu, *Chem. Commun.* **2011**, 47, 3924.
- [18] X. Fu, X. Ren, J. Shen, Y. Jiang, Y. Wang, Y. Orooji, W. Xu, J. Liang, *Molecular Catalysis.* **2021**, 499, 111298.
